# Supplementary material for: Alteration of N6 -Methyladenosine mRNA Methylation in a Rat Model of Cerebral Ischemia–Reperfusion Injury
Source: Front Neurosci. 2021 Mar 16;15:605654. doi: 10.3389/fnins.2021.605654 (PMC8009187; doi:10.3389/fnins.2021.605654)
Supplement: Supplementary Table 2 — Detailed information on the 490 key genes. [file Table_2.XLSX]

## Sheet: Sheet1
Gene	Differentially methylated RNA sites				Differentially expressed genes			GSE78731		GSE61616		Regulation
	Strand	Locus	Fold change	P_value	Fold change	logFC	P_value	logFC	P_value	logFC	P_value
Lgals3	+	chr15:28094061-28106276	26.0227	2.10235e-08	39.8821	5.31767	5e-05	4.35343	0.010185	5.97673	1.74263e-08	up
C1qb	-	chr5:159008940-159014494	4.2619	5.63414e-09	3.56408	1.83353	5e-05	1.93436	0.010185	4.08098	1.57606e-08	up
Itgb2	-	chr20:13944199-13966161	6.14084	2.27736e-08	5.32514	2.41282	5e-05	1.73967	0.0114646	4.18483	7.03217e-08	up
Dtx3l	+	chr11:70846233-70855846	3.10488	1.41396e-07	2.11297	1.07927	0.00325	—	—	1.77913	0.00011558	up
Hcls1	-	chr11:69828260-69850286	5.06748	2.0814e-08	4.85829	2.28045	5e-05	1.47573	0.0154706	2.61699	1.09276e-06	up
Fn1	-	chr9:78674438-78747362	7.41289	3.79345e-08	4.19561	2.06888	5e-05	1.5864	0.0148666	2.53834	3.30317e-05	up
Baz1a	-	chr6:85333775-85413029	3.39331	4.79118e-06	4.28389	2.09892	5e-05	—	—	2.55615	8.20107e-07	up
Lyl1	+	chr19:36790825-36793693	13.1014	3.72144e-06	3.73925	1.90275	0.00485	1.57195	0.0115062	2.82183	5.05655e-07	up
Cd44	-	chr3:99339454-99426032	11.6095	2.24788e-08	27.7093	4.7923	5e-05	2.20213	0.0136659	2.74779	4.66971e-07	up
Il1r1	+	chr9:46681411-46720622	3.19642	7.35625e-08	4.55348	2.18697	5e-05	—	—	1.80493	0.000293616	up
Ctsk	+	chr2:216154150-216164778	3.10969	9.81063e-09	3.0645	1.61565	5e-05	—	—	2.74619	4.67091e-05	up
Pdlim7	+	chr17:11762294-11777443	8.81864	7.32083e-08	2.74988	1.45937	5e-05	1.39922	0.0150813	1.30677	0.00414293	up
Stk10	+	chr10:17316680-17409678	2.88841	3.7995e-12	2.00601	1.00433	0.0001	—	—	2.64988	7.43552e-07	up
Icam1	+	chr8:22092134-22103927	28.3095	2.8305e-08	8.16634	3.02969	5e-05	1.10316	0.0186624	2.54663	2.1878e-06	up
Procr	+	chr3:157650398-157654720	30.3659	4.97024e-11	14.249	3.83279	5e-05	—	—	2.23576	3.75021e-05	up
Tgfbi	-	chr17:10576348-10605606	10.187	4.57938e-09	5.38639	2.42932	5e-05	—	—	3.0386	3.68718e-06	up
Csf3r	+	chr5:147796333-147820326	5.05614	1.93949e-09	5.72232	2.5166	5e-05	1.08066	0.0112286	3.95651	2.17429e-07	up
Lamc1	-	chr13:75622194-75749168	2.77141	1.3613e-09	2.61516	1.3869	5e-05	—	—	1.5223	0.000766045	up
S1pr2	-	chr8:22041266-22052351	5.35146	1.2167e-07	2.84433	1.50809	5e-05	—	—	1.46257	0.000486718	up
Bid	-	chr4:220531876-220554316	4.29695	3.67323e-08	2.87609	1.52411	5e-05	—	—	1.40222	3.6047e-05	up
Plin2	-	chr5:108985562-108999161	14.585	2.53915e-08	15.4547	3.94997	5e-05	2.1817	0.0185481	3.44546	4.33952e-06	up
Abi3bp	-	chr11:49393775-49607902	7.24138	3.27848e-08	2.39063	1.25739	0.0034	—	—	1.89155	0.00424745	up
Serpine1	+	chr12:24653384-24663763	443.048	7.29693e-08	529.09	9.04737	5e-05	1.61452	0.0197729	1.73534	0.00173886	up
Nek6	+	chr3:28080321-28113347	2.67308	7.88322e-06	2.96321	1.56716	5e-05	—	—	1.7649	2.48419e-06	up
Iqgap1	-	chr1:143476886-143567395	3.9459	2.67946e-13	3.29119	1.71861	5e-05	—	—	1.87796	7.93585e-05	up
Top2a	-	chr10:86699276-86735462	12.6164	9.86531e-06	3.69686	1.8863	5e-05	2.45318	0.0122166	3.21775	6.43006e-07	up
Slc39a1	+	chr2:209042654-209048221	4.56648	2.33294e-08	2.76619	1.4679	5e-05	—	—	1.43079	4.42314e-06	up
Anxa1	-	chr1:245192876-245208910	10.679	1.07973e-08	12.2995	3.62053	5e-05	1.93361	0.0163959	4.00773	2.65382e-06	up
Eng	+	chr3:17021959-17058548	3.54808	1.72989e-07	3.58082	1.84029	5e-05	—	—	2.01871	3.89895e-05	up
Col4a1	+	chr16:82987856-83097435	10.7243	1.74315e-10	6.73212	2.75106	5e-05	—	—	2.79035	2.01719e-06	up
Fgr	+	chr5:154839095-154866416	15.158	2.3464e-08	11.2671	3.49404	5e-05	1.39233	0.0125137	1.47993	3.68859e-05	up
Col18a1	+	chr20:14388742-14495241	6.32127	1.58065e-10	4.11639	2.04138	5e-05	1.09032	0.0224958	3.0687	2.44696e-06	up
Cd276	-	chr8:63090339-63120668	5.11228	3.67044e-13	2.12532	1.08768	5e-05	—	—	1.28888	1.37848e-05	up
Ptprc	-	chr13:60094038-60205338	13.1216	1.76436e-06	5.3575	2.42156	5e-05	1.95115	0.0114646	4.17834	1.55337e-07	up
Mcm2	-	chr4:186066379-186080792	4.68947	1.21029e-10	3.61609	1.85443	5e-05	1.00137	0.0253437	1.87286	2.52813e-06	up
Rbms1	-	chr3:51911275-52132833	2.37381	1.02063e-07	2.63726	1.39904	5e-05	—	—	1.2321	5.95512e-05	up
Pecam1	-	chr10:94598951-94632587	2.54414	1.69153e-07	2.71643	1.44171	5e-05	—	—	1.16583	0.000502135	up
Uaca	+	chr8:65436327-65524224	4.02938	1.02532e-07	2.19867	1.13663	5e-05	—	—	1.09113	0.0026088	up
Pycard	-	chr1:206460800-206462095	2.72434	4.08352e-11	3.91961	1.97071	0.00535	2.01143	0.0106141	4.31124	2.12415e-08	up
Emp3	-	chr1:102979696-102982874	7.78131	1.76773e-09	8.44513	3.07812	5e-05	2.17461	0.0145163	2.3664	0.000166672	up
Pdpn	-	chr5:165646113-165679595	11.0808	1.37953e-08	9.12472	3.18978	5e-05	1.50136	0.0208245	2.31054	5.35194e-07	up
Ncf4	+	chr7:119473858-119490871	20.733	2.12687e-08	11.2593	3.49304	0.0001	2.12452	0.0115062	2.17421	2.19232e-07	up
Tln1	-	chr5:63558229-63604807	3.03958	6.29643e-12	2.35858	1.23792	5e-05	—	—	1.70008	1.38913e-05	up
Spidr	-	chr11:92071680-92313960	23.4459	7.3844e-09	2.55145	1.35132	0.0002	—	—	1.28044	2.85724e-05	up
Shc1	+	chr2:208159785-208171348	4.32471	2.58086e-06	5.28759	2.40261	5e-05	1.03175	0.0123912	3.20905	6.45262e-08	up
Fbn1	-	chr3:124095125-124289500	7.29762	4.30669e-08	8.02366	3.00426	5e-05	1.00852	0.0214569	3.07153	1.46669e-05	up
Rassf4	-	chr4:214707826-214742088	4.6685	1.58465e-08	3.89745	1.96253	5e-05	1.05509	0.010805	3.02724	6.13882e-06	up
Vwf	+	chr4:225163214-225229122	5.31888	4.23969e-08	3.36375	1.75007	5e-05	1.04544	0.0309426	1.63348	0.00137489	up
Emp1	+	chr4:233415323-233449254	25.0311	3.50231e-08	9.96148	3.31636	5e-05	1.91011	0.0143821	2.99851	6.6427e-06	up
Anpep	-	chr1:142522425-142540882	4.25881	1.83653e-07	2.81205	1.49162	5e-05	1.57737	0.0352185	2.46938	0.000220347	up
Angptl4	-	chr7:18805415-18811643	4.91187	1.76906e-06	8.80144	3.13774	5e-05	—	—	1.89903	0.00130048	up
Dab2	+	chr2:75489434-75510919	6.54773	7.04671e-09	2.27382	1.18512	5e-05	—	—	2.909	0.000114705	up
Prkcd	-	chr16:6588978-6608725	2.7402	3.79782e-07	3.21429	1.6845	5e-05	—	—	1.40269	3.67292e-06	up
Adamts9	+	chr4:188409400-188604215	9.5124	5.30767e-08	11.4015	3.51115	5e-05	—	—	1.26232	0.00369452	up
Gbp2	+	chr2:266805233-266821133	6.45155	6.5395e-07	8.71264	3.12311	5e-05	1.4865	0.0135366	3.30653	2.62656e-06	up
Ptpn6	-	chr4:224256736-224281486	2.48994	5.47086e-07	3.25918	1.70451	5e-05	2.22536	0.010185	4.12132	2.73924e-07	up
Col3a1	+	chr9:51689491-51725414	6.91414	1.59469e-06	2.23881	1.16273	5e-05			5.27552	1.62191e-06	up
Ahnak	+	chr1:232122558-232151281	2.23845	3.24595e-06	2.0722	1.05116	5e-05	1.00184	0.010185	1.97605	0.000155135	up
Cp	+	chr2:124467374-124551506	5.89674	1.80809e-07	10.9806	3.45689	5e-05	2.36067	0.0183229	5.44421	4.56367e-07	up
Ehd4	-	chr3:118425619-118489608	2.3537	1.24074e-07	2.0428	1.03055	5e-05	—	—	1.76657	6.25418e-06	up
Serpinh1	-	chr1:170503595-170510775	3.29445	1.47641e-07	2.93451	1.55312	5e-05	—	—	1.96455	5.99286e-05	up
Col6a1	+	chr20:14817562-14835866	5.01195	1.46623e-07	2.73743	1.45282	5e-05	—	—	1.54422	0.00115543	up
Ano6	+	chr7:136781651-136973259	4.11896	6.26238e-11	4.26265	2.09175	5e-05	—	—	1.55391	0.00019306	up
Arpc1b	-	chr12:13321398-13334967	8.63383	1.58298e-10	6.14392	2.61916	5e-05	1.94267	0.0122166	3.65267	1.45453e-08	up
Col5a1	+	chr3:11789102-11935751	2.83345	1.23087e-09	2.5427	1.34636	5e-05	—	—	1.3458	0.000666798	up
Bag3	+	chr1:206989243-207013176	5.5413	4.65554e-07	5.34641	2.41857	5e-05	—	—	1.32583	0.000311567	up
Lbp	-	chr3:160792746-160819996	1222	1.59688e-08	178.406	7.47902	0.0022	1.35908	0.0363494	1.17528	4.95629e-05	up
Gfap	-	chr10:90763148-90771847	5.6159	1.57826e-07	6.7539	2.75572	5e-05	1.92573	0.0122166	1.62089	2.7902e-05	up
Rgs1	-	chr13:66051575-66055901	32.7218	1.3288e-08	11.8165	3.56273	0.00115	1.75404	0.0114646	3.68289	1.17157e-05	up
S100a6	+	chr2:209441322-209442604	21.8314	1.62949e-07	17.6712	4.14333	5e-05	2.08341	0.0136659	3.48703	1.14635e-06	up
Mcm6	-	chr13:50127492-50152683	4.26278	8.76659e-08	3.09867	1.63165	5e-05	1.0534	0.0288465	2.12132	1.96368e-06	up
Arhgdib	-	chr4:235170739-235189433	3.4024	2.65908e-09	2.94688	1.55919	5e-05	1.53067	0.0105911	2.76363	5.71495e-07	up
P4hb	-	chr10:109329598-109341105	2.7046	1.15622e-06	2.95488	1.5631	5e-05			1.59698	4.29606e-07	up
Ctsc	+	chr1:158231465-158263672	3.34172	1.59657e-07	3.51813	1.81481	5e-05	1.89524	0.0159155	4.16849	6.27071e-07	up
S1pr3	-	chr17:15873395-15874535	14.2768	1.00961e-07	10.5001	3.39233	5e-05	—	—	1.44675	1.88314e-05	up
Steap4	-	chr4:23017454-23062780	5.16508	3.87844e-06	2.91994	1.54594	0.00025	—	—	3.32868	7.84174e-06	up
Hlx	-	chr13:107315403-107320809	4.91704	5.20731e-09	4.27016	2.09429	0.00145	1.89373	0.0119762	1.68786	2.313e-05	up
Cmtm7	-	chr8:122126647-122153564	2.04443	3.32377e-07	2.73987	1.45411	0.00025	1.56273	0.015671	3.56823	1.74263e-08	up
Col6a3	-	chr9:97620135-97670009	4.1874	1.32713e-07	4.9946	2.32037	5e-05	—	—	4.08757	9.66902e-07	up
Bmp7	-	chr3:176945361-177020736	9.88321	3.26451e-08	2.92195	1.54693	5e-05	1.16588	0.0148666	1.25388	0.000878253	up
Arrdc4	-	chr1:130820198-130829248	2.11457	1.76444e-09	2.61511	1.38687	0.0386	—	—	1.15436	0.000110141	up
Pawr	-	chr7:51286669-51365775	4.7712	1.3439e-07	4.75653	2.24991	5e-05	—	—	1.14702	0.0138867	up
Lcp1	+	chr15:60932333-60988849	5.08146	5.82983e-09	3.488	1.8024	5e-05	1.9591	0.0110629	3.73417	2.40466e-06	up
Itgal	+	chr1:205742368-205780279	19.0952	3.81324e-07	10.8887	3.44476	5e-05	—	—	4.16973	7.98935e-08	up
C3ar1	-	chr4:222704907-222711635	4.72835	3.25732e-08	3.94067	1.97844	0.0001	1.32534	0.0174078	1.4741	1.66917e-06	up
Flna	+	chr1:152204098-152227391	7.5308	2.74886e-08	5.73781	2.5205	5e-05	1.22698	0.017624	1.74712	0.000140774	up
Sh2b2	+	chr12:25473619-25501386	4.65242	1.26042e-07	2.80098	1.48593	5e-05	—	—	1.70673	6.86447e-06	up
Ch25h	-	chr1:260029122-260030019	5.85505	1.13027e-06	4.51351	2.17425	5e-05	1.0195	0.0273155	2.5908	0.000121863	up
Col7a1	+	chr8:117046350-117078589	13.7249	3.00025e-08	21.6711	4.4377	5e-05	—	—	1.15239	0.000914425	up
Tnc	-	chr5:83891005-83950462	11.6989	4.26249e-08	10.5925	3.40497	5e-05	—	—	1.87445	0.000234668	up
Rai14	+	chr2:84073867-84128487	9.62356	2.11561e-08	6.97025	2.80121	5e-05	—	—	2.04698	8.85502e-05	up
Hspb1	-	chr12:25837083-25838661	114.254	2.37708e-07	123.175	6.94457	5e-05	3.02953	0.0217075	3.18868	1.23934e-06	up
Mcm3	-	chr9:25770287-25788415	4.98959	4.0529e-08	4.48305	2.16448	5e-05	2.32228	0.0135366	1.35025	2.77855e-05	up
Tmem252	+	chr1:249846416-249851701	13.7846	1.31555e-07	10.8686	3.4421	5e-05	—	—	1.82266	0.0244364	up
Kpna2	-	chr10:94940856-94952889	2.60075	1.06211e-07	2.11068	1.07771	5e-05	1.12507	0.0234445	—	—	up
Fxyd5	-	chr1:90620338-90629722	4.40101	7.75227e-07	5.31828	2.41096	5e-05	1.60921	0.0134413	3.77891	1.23302e-07	up
Rbm3	+	chrX:15882042-15885501	2.03724	3.38344e-06	2.52692	1.33738	5e-05	—	—	1.20581	0.000125372	up
Vim	+	chr17:82500857-82509377	7.23379	1.30042e-07	6.21416	2.63556	5e-05	2.59391	0.0123912	3.38787	3.47991e-07	up
C1s	-	chr4:224162095-224174113	6.06054	5.83988e-08	3.45477	1.78859	5e-05	—	—	2.74028	3.72541e-07	up
Slc6a20	-	chr8:131864859-131905953	3.62769	4.3132e-07	4.49412	2.16804	5e-05	—	—	1.67191	0.000821016	up
Chsy1	+	chr1:128095352-128156041	2.04151	6.40155e-06	2.96456	1.56782	5e-05	—	—	1.71034	2.01719e-06	up
Kif22	-	chr1:205441132-205449441	14.0196	1.9266e-11	8.91985	3.15702	0.0019	1.8798	0.0185284	2.0884	2.12632e-06	up
Fgl2	-	chr4:10315674-10321309	8.04182	1.36885e-06	8.6769	3.11718	5e-05	—	—	3.9962	7.24393e-08	up
Stat3	-	chr10:88584611-88638724	4.73742	1.32032e-07	4.75848	2.2505	5e-05	—	—	1.14485	0.000134468	up
Hmox1	+	chr19:25622555-25629372	31.5709	4.36341e-08	44.2962	5.46911	5e-05	2.32631	0.0196672	3.21945	3.76234e-06	up
Flnc	+	chr4:56478246-56505940	40.3792	7.83597e-13	16.6355	4.05619	5e-05	—	—	1.79397	0.000127047	up
Rhbdf2	-	chr10:105236675-105243042	95	2.1634e-08	6.65072	2.73351	0.00115	—	—	1.8235	7.0603e-07	up
Rbp1	+	chr8:105891147-105912684	6.02704	1.11013e-11	5.16916	2.36993	5e-05	1.5676	0.0173219	3.30683	1.49086e-05	up
Olr1	-	chr4:211883404-211905489	4.21014	3.21224e-06	11.0698	3.46856	5e-05	1.6656	0.0123912	2.11089	0.000348886	up
Ednra	+	chr19:44791229-44874904	13.3259	4.36544e-12	2.9419	1.55675	5e-05	—	—	1.89143	1.13493e-05	up
Spp1	-	chr14:6653085-6658917	174.534	4.31946e-07	171.37	7.42097	5e-05	4.99221	0.010185	7.39716	3.5491e-08	up
Tyrobp	+	chr1:90031116-90034967	3.91557	2.10888e-07	3.66459	1.87365	5e-05	2.3658	0.0106141	4.20302	7.26969e-09	up
Fbln2	-	chr4:187651234-187690477	13.0059	1.86891e-07	9.99821	3.32167	5e-05	—	—	1.39107	0.000201995	up
Tax1bp3	+	chr10:59482717-59487235	4.7145	7.62615e-08	5.24005	2.38958	5e-05	1.15012	0.0145435	2.55425	2.10513e-06	up
Il6r	-	chr2:208629065-208677779	2.85367	2.25499e-07	3.65631	1.87039	5e-05	—	—	1.65836	5.67029e-05	up
Tnip2	+	chr14:82175495-82192493	4.93147	1.0417e-07	3.79571	1.92437	5e-05	—	—	1.29427	5.31609e-05	up
Col16a1	+	chr5:151976657-152030103	4.28232	4.49626e-08	3.30702	1.72553	5e-05	—	—	1.0695	0.00016953	up
Tgm2	+	chr3:160977904-161007258	6.33333	8.4928e-09	7.15405	2.83876	5e-05	—	—	1.67632	0.000157777	up
Myof	-	chr1:264066286-264215424	8.90749	5.40811e-09	2.97139	1.57114	5e-05	—	—	1.72007	0.000674996	up
Col4a2	-	chr16:82853205-82987193	5.83465	9.86377e-09	5.11215	2.35393	5e-05	—	—	1.07446	0.000829881	up
Olfml2a	+	chr3:28455739-28481133	2.29711	3.91834e-06	2.8422	1.50701	5e-05	—	—	1.42774	0.000844894	up
Prc1	+	chr1:143039959-143061006	2.55169	1.24702e-06	3.11997	1.64153	0.00055	2.04032	0.0155606	2.25773	7.67777e-06	up
Itgb1	+	chr19:72324611-72372323	2.24482	3.4775e-07	2.04697	1.03349	5e-05	—	—	1.74132	1.55508e-05	up
Psmb8	+	chr20:6070356-6073320	19.0821	6.61717e-09	5.11435	2.35455	5e-05	1.75199	0.010185	3.26548	3.69044e-07	up
Lcn2	-	chr3:16763058-16766466	54.1121	2.86779e-08	186.601	7.54381	0.0001	—	—	1.35622	0.0108896	up
Myc	+	chr7:103157451-103162376	9.51962	1.27891e-08	7.93131	2.98756	5e-05	—	—	2.0103	1.90644e-05	up
Itga1	-	chr2:71666605-71823121	7.22165	5.26167e-08	3.36023	1.74856	5e-05	—	—	1.4235	0.00107377	up
Myo1c	-	chr10:64185627-64201933	3.97168	9.65591e-07	3.11495	1.63921	5e-05	—	—	1.11047	0.00115021	up
Tubb6	+	chr18:62314820-62324460	17.7437	2.10039e-07	36.365	5.18448	5e-05	2.6677	0.0152958	2.61083	3.8398e-06	up
Il4r	+	chr1:203940372-203952928	9.20346	8.37823e-08	7.31303	2.87047	5e-05	—	—	1.1286	0.000182185	up
Cttnbp2nl	-	chr2:226917955-226964542	2.46237	1.78117e-06	2.25093	1.17052	5e-05	—	—	1.57229	8.89902e-06	up
Tmod3	-	chr8:82035311-82095422	2.80891	1.43798e-08	2.65739	1.41001	5e-05	—	—	1.50157	4.04603e-05	up
Ifitm3	-	chr1:220730713-220731861	12.0297	5.77313e-08	10.6666	3.41503	5e-05	1.06528	0.0155606	2.6355	7.52559e-06	up
Alox5ap	-	chr12:8950727-8974708	3.9709	1.79413e-07	4.25394	2.0888	0.0006	—	—	2.72217	3.23904e-06	up
Mmp14	+	chr15:36960272-36969507	2.37858	5.08868e-07	2.10897	1.07654	5e-05	—	—	2.91294	0.000118641	up
Cdca7	+	chr3:65630825-65641459	2.21229	4.54831e-08	3.77454	1.9163	0.00125	—	—	1.85937	2.03502e-06	up
Col6a2	+	chr20:14931525-14959214	2.81385	1.01652e-11	2.20418	1.14024	5e-05	—	—	1.50288	0.000245611	up
Sp110	-	chr9:92324921-92346959	2.80678	6.11904e-07	3.18217	1.67001	5e-05	—	—	2.86701	1.07838e-07	up
Fcgr2b	-	chr13:93924703-94068497	9.00386	1.3484e-08	8.15825	3.02826	5e-05	2.20731	0.0115198	5.09411	1.26614e-07	up
Enpp3	+	chr1:23093112-23164279	7.12591	4.451e-08	11.057	3.46689	5e-05	—	—	2.13703	2.61188e-05	up
Atf3	-	chr13:114411694-114443438	35.194	3.39655e-07	20.4754	4.35582	5e-05	2.06338	0.0175391	2.27139	0.000182904	up
Mapkapk3	-	chr8:115368434-115402229	2.42998	6.57278e-06	2.28892	1.19467	5e-05	—	—	1.54611	3.68718e-06	up
Tpm4	-	chr16:19244265-19258182	4.31277	2.05401e-06	4.45594	2.15573	5e-05	1.082	0.0222276	2.50333	2.15768e-07	up
Runx1	-	chr11:36371332-36460969	5.38294	7.02471e-07	6.18507	2.62879	5e-05	1.03093	0.0229774	2.0466	1.48398e-05	up
Axl	-	chr1:83812117-83840542	2.38873	1.15033e-08	2.06364	1.04519	5e-05	—	—	2.01385	6.4344e-07	up
Sdc1	+	chr6:43667443-43689898	39.2092	2.4889e-08	33.3695	5.06046	5e-05	2.18634	0.0286471	2.70953	5.28292e-05	up
Adcy4	-	chr15:38342433-38358287	4.37895	8.73503e-06	4.60832	2.20424	0.00015	—	—	2.19093	3.48965e-07	up
Pxn	-	chr12:48595399-48642173	4.4753	2.42614e-08	3.03873	1.60347	5e-05	—	—	1.02361	0.000791201	up
C3	+	chr9:8728464-8754412	2.81396	2.91719e-07	4.46534	2.15877	5e-05	—	—	3.6822	1.94203e-05	up
Dap	+	chr2:103949818-104002894	2.82111	7.68638e-07	2.04197	1.02996	5e-05	1.19085	0.021194	2.56842	6.03279e-06	up
Lrrc32	+	chr1:169649229-169661088	4.517	4.17318e-07	5.51752	2.46402	5e-05	—	—	1.63593	0.00243149	up
Ripk1	-	chr17:33430660-33462906	2.23614	1.17411e-11	2.33242	1.22183	5e-05	—	—	1.18835	2.2929e-05	up
Ifi30	+	chr16:20282757-20287840	2.49825	1.00961e-10	3.20455	1.68012	5e-05	2.31321	0.0123161	4.31284	6.71945e-09	up
Irf1	+	chr10:38891467-38898469	7.16626	2.90983e-08	3.2811	1.71418	5e-05	—	—	1.83049	1.48398e-05	up
Ifi27l2b	-	chr6:136556835-136558324	16.4507	1.08243e-07	11.8047	3.56129	0.0106	1.15222	0.0212108	1.5618	0.000637993	up
Loxl1	-	chr8:62843790-62868157	3.63953	3.41613e-06	2.00756	1.00544	0.0002	—	—	3.43648	2.03502e-06	up
Msn	+	chrX:66068393-66137456	9.08425	2.71671e-08	9.62416	3.26666	5e-05	1.07091	0.0228035	2.70104	3.93604e-07	up
Sh3bp2	-	chr14:82122932-82160436	2.39482	7.59438e-10	2.06564	1.04659	0.0006	1.16112	0.0123912	2.17641	3.2209e-05	up
Cemip	-	chr1:147000789-147067480	2.90856	1.79383e-08	2.73255	1.45025	5e-05	—	—	1.52349	0.00222816	up
Fam129b	+	chr3:17257992-17344203	4.54138	7.98816e-08	4.34236	2.11848	5e-05	—	—	1.04066	2.87742e-05	up
Hck	+	chr3:154982908-155025526	5.34711	2.191e-07	5.5492	2.47228	5e-05	2.0971	0.0122166	4.03863	3.18194e-07	up
Piezo1	-	chr19:66009930-66075579	3.7408	1.29109e-11	6.29528	2.65427	5e-05	—	—	2.61549	7.28038e-06	up
Ezh2	-	chr4:141955863-142018471	2.34221	5.54326e-06	2.13085	1.09143	0.00845	—	—	1.5377	8.62699e-07	up
Clec14a	-	chr6:88834332-88835739	2.55494	1.3171e-06	2.33153	1.22128	0.00145	—	—	2.04522	0.00056353	up
Slc25a24	+	chr2:231401403-231438472	2.72847	3.46617e-07	3.38677	1.75991	5e-05	—	—	1.87978	0.000347117	up
Ltbr	-	chr4:224839882-224846284	3.38179	1.16338e-11	3.04257	1.60529	5e-05	—	—	1.93877	1.63047e-05	up
Mt2A	-	chr19:11283093-11283867	7.49587	1.89373e-06	5.77364	2.52948	5e-05	1.63742	0.0229851	1.97196	2.50613e-05	up
Zfp36	+	chr1:86595417-86597898	11.313	3.84814e-07	9.4864	3.24586	5e-05	—	—	1.03255	0.000847771	up
Trim25	-	chr10:73754575-73769423	4.27445	1.53094e-10	2.53694	1.34309	0.00085	—	—	2.27865	2.84461e-06	up
Rnh1	-	chr1:221068621-221076550	7.45115	2.21333e-12	3.21019	1.68266	5e-05	—	—	1.05634	6.45351e-05	up
Aff1	-	chr14:7216502-7314729	2.84329	3.01229e-10	2.58084	1.36784	5e-05	—	—	1.15995	0.000113313	up
Sec24d	+	chr2:246849787-246919956	4.81804	1.38071e-09	2.84315	1.50749	5e-05	—	—	1.5239	0.000142174	up
PVR	-	chr1:82085298-82100950	19.9806	2.45852e-10	8.37083	3.06537	5e-05	—	—	1.0421	0.00188161	up
Rin3	+	chr6:135381784-135490155	2.71895	9.13264e-11	4.13819	2.049	5e-05	—	—	2.6827	3.88861e-06	up
Plekhg2	+	chr1:86601600-86614808	2.8823	2.25844e-08	2.5241	1.33577	5e-05	—	—	1.07288	0.000683406	up
Atp10d	-	chr14:38288164-38385637	2.2154	1.18147e-06	3.57975	1.83986	5e-05	—	—	1.71296	7.3186e-05	up
Plin3	+	chr9:9761438-9773323	3.26452	2.02966e-08	4.61733	2.20706	5e-05	1.15762	0.0153339	2.62483	1.18042e-05	up
Olfml2b	+	chr13:93609912-93647084	2.8387	1.95265e-07	3.54998	1.82781	5e-05	—	—	1.27559	0.00102795	up
Timp1	-	chrX:2136353-2193641	86.3841	8.93623e-08	152.6	7.25361	0.02675	3.30866	0.0164591	4.51546	1.69061e-07	up
Lrrfip1	+	chr9:97871991-97939937	6.01575	2.15184e-06	3.71793	1.8945	5e-05	1.35365	0.0132874	3.21591	5.63554e-07	up
Crip1	+	chr6:146959580-146961385	3.36403	2.63515e-07	2.62774	1.39382	0.0023	—	—	1.83931	0.000582512	up
Fpgs	-	chr3:17058729-17068931	85.6	1.98606e-07	2.8224	1.49692	0.0001	—	—	2.0226	7.46642e-05	up
Ucp2	+	chr1:171707620-171713990	4.8913	1.32006e-07	2.58394	1.36957	5e-05	1.2814	0.0264946	1.63795	0.000119503	up
Homer3	-	chr16:20733290-20740680	4.76351	2.00587e-07	3.61802	1.8552	5e-05	—	—	1.00339	0.00131642	up
Irf9	+	chr15:38173130-38178333	2.9377	4.80715e-08	3.24752	1.69934	5e-05	—	—	1.32976	0.00233696	up
Lyn	+	chr5:21307088-21422838	2.1884	3.07033e-06	2.4951	1.3191	5e-05	—	—	2.40622	2.31032e-06	up
Spsb1	-	chr5:170557218-170568525	2.38481	6.85009e-06	3.52189	1.81635	5e-05	—	—	1.05014	0.00132041	up
Nfkb1	-	chr2:259330383-259421280	2.82769	2.28121e-08	2.02389	1.01713	5e-05	—	—	1.17319	3.63642e-06	up
Sipa1	-	chr1:227941670-227953682	2.38285	1.2429e-06	2.68031	1.4224	5e-05	1.14253	0.0127452	1.76176	5.17935e-06	up
Myo1f	+	chr7:18618341-18669048	4.50275	7.86553e-09	3.68427	1.88138	5e-05	2.45504	0.010967	3.85645	5.83868e-07	up
Rsad2	-	chr6:54376867-54388860	3.40785	5.6941e-06	2.61406	1.38629	0.00015	—	—	1.45866	0.00811077	up
Errfi1	+	chr5:171529355-171541439	6.07149	1.70658e-08	3.99302	1.99748	5e-05	—	—	1.23798	0.00106509	up
Csf2ra	+	chr14:1465138-1469169	2.09814	8.00011e-07	5.39787	2.43239	0.01525	1.2981	0.0160666	3.30756	1.20365e-06	up
Casp8	+	chr9:65420842-65468950	3.25594	5.44166e-06	3.19213	1.67452	0.00245	—	—	2.26455	5.0907e-06	up
Ifitm1	+	chr1:220687944-220689004	13.5953	2.39244e-08	10.1419	3.34225	5e-05	2.75497	0.0134413	5.62324	7.3293e-07	up
Mrc1	+	chr17:83099573-83180475	3.93236	1.87898e-07	2.9312	1.55149	5e-05	—	—	3.05838	0.000615101	up
Pdlim1	-	chr1:266752409-266800857	5.04866	1.6136e-06	5.68795	2.50791	5e-05	—	—	1.47521	0.000352184	up
Srgn	-	chr20:33908573-33921685	5.30086	9.81695e-07	2.53337	1.34106	5e-05	—	—	1.19527	3.88624e-05	up
Ripk3	-	chr15:38359306-38368847	22.9467	6.89743e-08	25.6412	4.68039	0.0006	2.45896	0.010185	3.38137	1.49868e-07	up
Ptges	-	chr3:15086725-15098072	43.6616	2.37714e-07	61.6073	5.94503	5e-05	—	—	1.19152	0.00114331	up
Slc12a7	-	chr1:33511431-33564814	3.3741	8.44044e-10	2.13477	1.09408	5e-05	—	—	1.71502	0.000103792	up
Plaur	+	chr1:82587227-82602678	17.5119	6.90017e-09	14.5462	3.86257	0.0003	1.06465	0.0231332	1.84312	0.000308282	up
Plek	+	chr14:100353684-100386527	3.12985	5.53879e-06	3.19275	1.6748	5e-05	1.16199	0.010805	3.42984	6.2554e-08	up
Tnfrsf1b	-	chr5:166812969-166845910	3.47947	5.41064e-07	3.49521	1.80538	5e-05	1.44914	0.0266495	1.37672	4.8491e-05	up
Sp140	+	chr9:92349343-92396014	3.13882	9.75677e-06	6.26524	2.64737	0.00015	1.02543	0.0163334	2.207	7.7744e-07	up
Rps27l	+	chr8:77076268-77078924	3.63228	2.0455e-07	4.28	2.09761	5e-05	—	—	1.45634	1.99206e-06	up
Rbpms	+	chr16:61618887-61772854	6.21171	7.97914e-08	7.50577	2.908	0.0325	—	—	1.57828	0.00246898	up
Rab20	+	chr16:82824910-82848168	4.56685	2.70506e-07	5.5053	2.46082	0.0004	—	—	1.99866	6.071e-06	up
Pxdc1	+	chr17:32865486-32893955	2.73687	5.88138e-07	3.32255	1.73229	5e-05	—	—	1.40149	0.000194313	up
Slco2a1	+	chr8:110886313-110967442	26.2476	3.4688e-14	10.4187	3.38111	5e-05	—	—	1.85235	0.00284167	up
Cdt1	+	chr19:66090080-66095027	5.02723	5.29158e-08	3.9936	1.99769	0.00035	—	—	1.57611	6.21368e-06	up
Ppp1r18	-	chr20:5466493-5494142	3.21344	6.16249e-08	3.0636	1.61523	5e-05	—	—	2.63696	2.41298e-07	up
Loxl2	+	chr15:55059672-55092976	4.49497	5.8714e-08	2.79119	1.48088	0.0014	1.24934	0.0174347	2.85514	4.86209e-05	up
Ppic	-	chr18:47585435-47598040	3.4784	4.01223e-06	2.19984	1.1374	0.00085	1.0045	0.0282495	3.35778	8.97619e-06	up
Lox	-	chr18:46715871-46821060	15.3224	1.41337e-07	18.7557	4.22926	5e-05	—	—	2.77919	0.000474505	up
Gadd45a	-	chr4:162568470-162570782	5.48327	2.94293e-06	4.65667	2.2193	5e-05	—	—	1.50605	8.33985e-06	up
S100a4	+	chr2:209431369-209433679	10.1656	1.6693e-08	9.9277	3.31146	5e-05	3.41607	0.0105911	3.5762	2.81739e-06	up
LOC308990	+	chr1:205519719-205521652	3.36253	1.58296e-12	5.67181	2.50381	0.0014	—	—	1.97257	9.9961e-05	up
C5ar1	-	chr1:79452057-79458856	5.73839	6.56939e-08	4.6865	2.22851	0.0001	2.09112	0.0154706	3.82456	1.00405e-05	up
Ctsl	-	chr17:1861403-1867575	2.08234	7.7753e-06	2.54776	1.34923	5e-05	—	—	1.96874	1.98162e-07	up
Tagln2	+	chr13:95407051-95418495	6.5151	5.36211e-09	8.11972	3.02143	5e-05	1.40505	0.0235727	2.36054	5.99381e-05	up
Cd63	+	chr7:3304374-3305798	6.1776	7.678e-11	4.59126	2.19889	5e-05	1.32858	0.0173133	2.21059	1.63738e-07	up
Myd88	-	chr8:127229272-127233342	3.54906	3.12653e-06	3.77354	1.91592	5e-05	—	—	2.15133	2.2868e-07	up
Nt5e	+	chr8:95464240-95508297	4.34299	2.75702e-09	4.9256	2.3003	5e-05	—	—	2.01867	3.74826e-06	up
Il18	+	chr8:53606987-53613610	3.0744	1.79914e-07	2.90128	1.53669	0.00185	1.40432	0.0157476	3.42694	2.66068e-07	up
LOC685067	+	chr2:266748514-266769711	3.13992	1.67838e-07	2.77733	1.4737	0.0007	—	—	3.29799	6.4344e-07	up
Map3k8	+	chr17:54146363-54166886	2.4018	5.78386e-07	2.26852	1.18175	0.00385	—	—	2.62652	5.42985e-06	up
Rac2	-	chr7:119772954-119786171	10.9796	1.99512e-08	6.00423	2.58598	5e-05	2.47321	0.0104324	4.06682	3.78294e-09	up
Gja4	-	chr5:149142703-149145235	3.32984	9.61711e-07	3.93851	1.97765	0.00045	—	—	1.17432	0.000768344	up
Nid2	-	chr15:8984787-9041180	29.2143	1.5477e-08	2.08111	1.05735	5e-05	—	—	3.17587	2.25838e-05	up
Stom	-	chr3:19833116-19855740	4.43932	2.78033e-08	3.61453	1.85381	5e-05	—	—	2.7363	0.000140364	up
Rab32	-	chr1:6299754-6314539	7.31846	6.04857e-08	4.27049	2.0944	5e-05	1.44183	0.021214	3.91728	2.59666e-07	up
Arhgap17	-	chr1:200297803-200387187	2.92372	3.92523e-11	3.0028	1.58631	5e-05	—	—	1.5416	4.41415e-06	up
Ybx3	-	chr4:228170271-228193494	3.41243	3.90387e-08	3.58219	1.84084	5e-05	—	—	1.14205	3.96977e-05	up
Ets1	+	chr8:33858337-33921593	3.73418	2.62479e-07	2.75931	1.46431	5e-05	—	—	1.83081	2.81971e-06	up
Cmklr1	+	chr12:50577123-50581377	3.25175	1.62634e-08	3.10865	1.63629	0.0005	—	—	1.76834	1.38118e-05	up
C1r	+	chr4:224144369-224154807	3.46551	2.44811e-06	2.18816	1.12972	0.00015	—	—	2.56296	1.99206e-06	up
Cald1	+	chr4:61952323-62021827	2.60797	4.71614e-11	2.00696	1.00501	5e-05	—	—	1.49024	0.000282954	up
Fam60a	-	chr4:247533905-247542952	2.84097	9.25149e-08	5.27507	2.39919	0.01245	—	—	—	—	up
Ctsz	-	chr3:178574618-178585389	3.14839	2.18844e-09	3.89815	1.96279	5e-05	2.19455	0.0114646	4.2165	3.78294e-09	up
Lsp1	+	chr1:222524161-222557294	14.1869	3.75064e-08	12.758	3.67333	5e-05	1.74783	0.0123161	2.90593	2.32511e-06	up
Emilin2	-	chr9:119048147-119106488	2.98524	2.21356e-07	3.45836	1.79009	5e-05	—	—	1.00206	0.00770552	up
Mvp	-	chr1:205401190-205428861	3.37184	1.68532e-06	4.44733	2.15294	5e-05	—	—	2.34121	5.3808e-07	up
Tagln	-	chr8:48824387-48852863	7.72725	2.57778e-07	8.18357	3.03273	5e-05	1.59315	0.0192069	1.59615	0.000102706	up
Clic1	+	chr20:7113248-7122091	12.4554	3.55626e-09	10.8449	3.43894	5e-05	2.11444	0.0136659	3.37012	6.2554e-08	up
Rhoc	+	chr2:226691038-226697174	3.76757	6.27937e-08	4.12493	2.04437	5e-05	1.02254	0.0257191	1.33318	8.53677e-05	up
Zfp36l1	-	chr6:115988970-115992268	2.18621	8.04226e-06	2.45838	1.29771	5e-05	—	—	1.73167	2.0025e-06	up
Pxdn	+	chr6:57551668-57661402	5.04044	3.03818e-07	4.78069	2.25722	5e-05	—	—	1.30355	0.00210146	up
Tes	+	chr4:44929780-44968303	2.47507	8.53118e-07	2.5898	1.37284	5e-05	—	—	1.98868	2.7095e-06	up
Uhrf1	-	chr9:9731077-9749712	7.28261	3.42164e-08	2.19815	1.13629	0.0025	—	—	1.55949	6.75301e-06	up
P2ry2	-	chr1:172227769-172233748	7.30769	2.01643e-06	2.95504	1.56318	0.0041	—	—	1.07561	0.000682592	up
Fas	+	chr1:259812247-259844583	2.54131	1.54456e-07	2.47089	1.30503	0.03825	—	—	1.14575	0.000117264	up
Tfpi2	-	chr4:28855874-28860297	90.2	1.66461e-07	50.0182	5.64438	0.00125	—	—	3.23383	1.21025e-07	up
Vasp	-	chr1:81437101-81452365	4.69551	1.66101e-06	3.88849	1.95921	5e-05	—	—	2.44093	7.0603e-07	up
Inmt	-	chr4:150039150-150043447	70.9	2.84404e-06	36.8489	5.20355	5e-05	1.10676	0.0136659	2.29792	4.29122e-05	up
Samsn1	-	chr11:17910039-17960596	19.5952	3.57846e-06	15.8542	3.98679	0.04905	—	—	1.20904	0.000168746	up
Lgals3bp	-	chr10:107050331-107059670	4.28166	3.05022e-07	2.57332	1.36363	5e-05	1.38254	0.010185	3.24868	4.78377e-05	up
Prrx2	+	chr3:15040948-15077369	3.09808	2.2633e-06	4.6248	2.20939	0.00675	—	—	1.21898	0.00961377	up
Cd68	-	chr10:56014364-56016243	6.24272	5.68398e-08	6.2924	2.65361	5e-05	3.40322	0.0106141	5.87387	2.33272e-08	up
Carhsp1	+	chr10:5842866-5856458	6.1952	5.96902e-08	2.3985	1.26213	5e-05	—	—	1.08692	7.24046e-05	up
Tmem123	+	chr8:5995679-5999126	2.96733	1.18956e-08	2.11823	1.08286	5e-05	—	—	1.8857	2.69169e-06	up
Apobec1	-	chr4:222411175-222425679	2.37921	4.61085e-07	5.23036	2.38691	0.0146	2.97499	0.0123912	5.18251	4.17982e-08	up
Mx1	-	chr11:41398737-41420543	5.99612	9.40368e-07	4.01684	2.00606	5e-05	—	—	3.01424	0.000224117	up
Emilin1	-	chr6:36636869-36644587	6.49	3.46046e-08	2.21047	1.14435	5e-05	—	—	2.19413	1.18042e-05	up
Scamp2	+	chr8:62119184-62145786	2.88536	2.51706e-08	2.11278	1.07914	5e-05	—	—	1.78457	5.51255e-06	up
Mmp8	+	chr8:5771723-5780576	102.6	2.14244e-08	inf	inf	5e-05	—	—	1.36189	0.00069168	up
Fermt3	-	chr1:229241773-229263064	5.458	1.24691e-08	4.56166	2.18956	0.0004	1.3905	0.0171526	3.03636	1.61184e-07	up
Cyp1b1	-	chr6:2298848-2300644	9.11438	1.81549e-07	28.1285	4.81396	0.00035	1.27684	0.0215479	3.84883	1.18892e-06	up
Mgp	-	chr4:235113771-235117160	6.64946	2.25066e-07	7.34244	2.87626	5e-05	1.08813	0.0299784	3.41027	1.63738e-07	up
Lgals1	+	chr7:120144847-120147980	3.89617	1.54914e-06	2.87841	1.52527	5e-05	2.09396	0.0148063	3.09231	1.63562e-06	up
Gmfg	-	chr1:86528122-86533107	2.79807	6.33111e-07	4.83344	2.27305	0.00175	1.77937	0.0135366	3.85991	1.05905e-07	up
Cxcl10	+	chr14:17126850-17129068	20.3514	1.27926e-08	9.87219	3.30337	0.01035	—	—	2.15413	0.000515957	up
Antxr2	+	chr14:13133991-13216815	8.12821	4.04821e-08	7.16949	2.84187	5e-05	—	—	2.889	9.90753e-06	up
Litaf	+	chr10:3548078-3589969	3.13396	3.32781e-11	3.09029	1.62774	5e-05	—	—	1.92559	2.68295e-06	up
Angpt2	+	chr16:75509828-75715383	7.65914	2.21854e-07	10.6338	3.41059	5e-05	—	—	2.24588	0.00069884	up
S100a3	+	chr2:209427356-209430124	5.13835	1.72693e-07	4.48504	2.16512	5e-05	1.27198	0.0330411	2.36522	0.000148027	up
Smagp	-	chr7:140049629-140066357	17.9167	1.96765e-09	10.4704	3.38825	0.001	—	—	1.71673	0.000813138	up
Anxa3	-	chr14:14305732-14351478	3.09284	6.31199e-07	2.26335	1.17846	5e-05	1.4734	0.0105911	4.06901	9.66902e-07	up
Fkbp10	+	chr10:88119326-88131454	8.8009	1.71617e-08	3.40997	1.76976	0.0004	—	—	1.81342	8.36458e-05	up
Serpinb1a	+	chr17:34796324-34803701	4.80705	2.04037e-07	6.77269	2.75973	5e-05	1.64875	0.0136659	3.70704	2.16629e-06	up
Slc31a2	+	chr5:82242402-82252910	2.09532	7.48024e-07	2.13249	1.09254	0.0011	—	—	1.90848	1.70151e-05	up
Itgam	+	chr1:206522888-206573171	5.57511	2.34287e-13	8.44402	3.07793	5e-05	1.02084	0.0455777	2.95991	6.64831e-06	up
Gpnmb	+	chr4:143383025-143404102	9.4229	2.75991e-11	10.2142	3.35251	5e-05	4.99619	0.010185	6.11625	5.68063e-09	up
Clec10a	+	chr10:56506746-56511257	4.29381	7.82555e-08	2.91713	1.54455	0.00145	—	—	1.58996	0.00565173	up
Rbl1	+	chr3:158398176-158452482	4.82421	4.07467e-06	3.45278	1.78776	0.00095	—	—	2.8511	8.79726e-08	up
Postn	+	chr2:163331261-163362444	2.86934	1.24546e-07	3.45235	1.78758	5e-05	1.15809	0.0330331	2.26601	0.000157542	up
Cd99	-	chr20:57779376-57783907	2.26506	1.63164e-08	2.08785	1.06202	0.00125	—	—	1.34561	0.000196828	up
S100a10	-	chr2:210966309-210975004	7.17006	1.42562e-06	8.04627	3.00832	5e-05	1.84375	0.0185822	1.64474	3.02569e-05	up
Tapbp	-	chr20:7526667-7534619	2.6714	4.30914e-06	2.0248	1.01778	5e-05	—	—	1.23856	1.03128e-05	up
Fabp5	-	chr2:113735165-113738835	2.32734	4.27764e-07	2.35414	1.2352	5e-05	—	—	1.44575	1.12356e-05	up
Dock8	+	chr1:250225061-250417768	4.492	4.07741e-07	2.45448	1.29542	0.02305	1.29752	0.0126283	2.90003	1.37834e-06	up
Bgn	-	chr1:153067993-153080160	2.40386	1.9362e-06	2.21871	1.14972	5e-05	1.16736	0.0250636	3.19458	6.21425e-06	up
Fblim1	-	chr5:163841376-163867441	5.5918	1.38866e-07	3.57091	1.83629	0.00925	—	—	2.10405	0.000454828	up
Psmb9	-	chr20:6052971-6058393	3.64279	4.67772e-08	3.24242	1.69707	0.00145	1.36313	0.0115198	2.94895	2.51971e-06	up
Myl12a	-	chr9:118779625-118787509	4.72346	9.43424e-07	3.89637	1.96213	5e-05	—	—	1.84793	8.29795e-07	up
Pla2g4a	-	chr13:72028203-72172613	2.54851	7.95809e-08	3.71556	1.89358	5e-05	—	—	2.81486	4.17488e-06	up
Zfp217	-	chr3:173096853-173107574	2.22754	3.19674e-06	2.55285	1.35211	0.00035	—	—	2.33973	8.07681e-06	up
S100a11	-	chr2:210998953-211004364	13.6615	1.97473e-07	10.8816	3.44382	5e-05	2.38747	0.0135366	4.59077	3.14456e-06	up
Scara5	+	chr15:52819509-52910547	5.41919	1.6244e-13	3.88294	1.95715	0.001	—	—	3.79474	4.95629e-05	up
Ier3	-	chr20:5535616-5671944	6.25888	1.84961e-06	5.29261	2.40398	0.0004	—	—	2.18871	5.22945e-05	up
Lgmn	-	chr6:135492943-135518919	4.05978	2.2792e-10	2.35461	1.23549	5e-05	1.40256	0.0184944	2.48801	6.71945e-09	up
Lims1	+	chr20:29774110-29824244	3.67477	4.77467e-08	2.70135	1.43368	5e-05	—	—	1.38279	3.10227e-06	up
Ung	-	chr12:50028791-50037073	3.02634	1.2047e-07	2.05507	1.03919	0.0135	—	—	1.31577	7.33107e-05	up
Tnfrsf26	-	chr1:223668848-223688760	88.7	2.27739e-07	18.407	4.20218	0.02815	1.14223	0.0134413	1.61603	0.00117279	up
Pla1a	-	chr11:67166384-67203665	7.72561	7.38198e-07	20.5041	4.35784	5e-05	1.2956	0.0180019	1.78101	0.00190773	up
Col8a1	+	chr11:48073157-48201270	2.60448	4.02653e-07	4.41187	2.14139	5e-05	—	—	2.06137	0.000917356	up
Plau	-	chr15:3621552-3627467	105.9	1.4438e-08	14.3788	3.84587	0.00025	2.45524	0.0218843	5.32061	2.40466e-06	up
Cxcl1	-	chr14:18653038-18654811	843.3	1.48175e-08	inf	inf	5e-05	1.24208	0.0391536	1.62808	0.00016099	up
Lrg1	+	chr9:9939359-9941597	12.0016	1.76832e-07	12.587	3.65386	5e-05	1.29956	0.0475096	1.76899	0.00842389	up
Cxcl16	-	chr10:56817243-56828333	23.071	1.81962e-08	14.6146	3.86934	5e-05	1.5285	0.0142132	3.35662	2.59842e-07	up
Il2rg	-	chrX:71979752-72074783	61.6	2.89893e-06	9.12737	3.1902	0.0047	—	—	1.08418	0.000696495	up
Mdfi	+	chr9:14090318-14108948	3.59533	7.36432e-07	4.97505	2.31471	0.0046	—	—	1.51965	7.04573e-06	up
Rplp0	-	chr12:48588976-48592275	2.88547	3.38107e-07	2.19412	1.13364	5e-05	—	—	1.08021	3.78255e-06	up
Fam105a	-	chr2:100047743-100070970	3.50728	5.50209e-08	4.95275	2.30823	0.0001	1.81877	0.0142164	3.43906	4.11332e-07	up
Crispld2	+	chr19:63411525-63452565	6.64407	8.93284e-09	3.06085	1.61393	5e-05	—	—	1.14309	0.000707287	up
Capg	+	chr4:165178008-165189797	13.9853	2.59676e-09	10.9858	3.45757	5e-05	3.25951	0.0106141	4.43027	5.18568e-07	up
Tgif1	-	chr9:118636411-118648691	3.60017	1.936e-07	5.21638	2.38305	5e-05	—	—	1.71896	8.71233e-07	up
Pfn1	-	chr10:57018595-57021336	2.44305	2.59997e-07	2.19495	1.13419	5e-05	—	—	1.37603	3.30092e-06	up
Bst2	-	chr16:19800347-19803919	3.99744	2.56314e-09	2.62282	1.39112	0.0015	1.00641	0.0146654	1.92419	3.6196e-05	up
Tap1	+	chr20:6058582-6069216	5.4831	2.30987e-08	3.77933	1.91813	5e-05	—	—	1.94925	4.92607e-06	up
Thbd	-	chr3:149161660-149163394	5.01804	3.33674e-06	5.6399	2.49567	5e-05	—	—	1.47823	0.000175511	up
Hn1l	-	chr10:14120134-14139812	2.58674	5.10583e-09	2.71914	1.44315	5e-05	—	—	1.22047	3.38602e-05	up
Cmtm3	-	chr19:829212-836125	6.55245	1.87774e-08	2.2897	1.19516	0.0024	—	—	2.84405	1.15051e-07	up
Adm	+	chr1:182433108-182435280	10.5336	8.88644e-07	12.9591	3.69589	5e-05	—	—	1.7586	0.00110104	up
Mdfic	+	chr4:41790494-41870159	2.44289	3.87102e-08	2.52613	1.33693	5e-05	—	—	2.10981	0.000481458	up
Fcer1g	-	chr13:94228760-94233191	2.99358	1.23953e-10	2.63607	1.39839	5e-05	1.99572	0.010805	3.82925	9.27557e-09	up
Bcl2a1	+	chr8:96059039-96067299	9.23333	2.39816e-12	5.48347	2.45509	0.00015	—	—	4.31835	6.17191e-08	up
Fcgr1a	-	chr2:217916295-217925213	7.18487	2.15775e-08	4.45733	2.15618	5e-05	1.91088	0.0134413	3.15936	6.10964e-07	up
Pygl	-	chr6:102045138-102091169	5.14078	8.84543e-08	2.59778	1.37728	5e-05	—	—	2.13203	6.83411e-05	up
Slfn2	+	chr10:70001002-70007241	5.18634	1.88806e-06	4.94352	2.30554	5e-05	1.17535	0.0216193	1.86072	3.3687e-05	up
Dram1	-	chr7:29007047-29040615	6.06693	1.20353e-06	4.8235	2.27008	0.0008	—	—	2.09072	0.000976181	up
RT1-CE5	-	chr20:6968349-6973135	35.1216	2.29545e-14	2.20684	1.14198	0.00245	—	—	2.54476	0.0137008	up
Efemp1	+	chr14:112892386-112984799	2.76356	1.05197e-06	2.06983	1.04951	5e-05	—	—	1.71329	3.2328e-05	up
Fcgr3a	+	chr13:93924703-94068497	8.76642	1.02776e-06	6.1395	2.61812	0.0065	2.28998	0.0112286	4.6862	1.17003e-08	up
Cd86	+	chr11:70172559-70208488	3.87623	4.08943e-06	5.89491	2.55947	0.0156	1.06235	0.0173781	4.19862	1.06163e-07	up
Ccl6	-	chr10:70423915-70436258	12.8356	2.82182e-07	25.745	4.68622	0.0001	1.80141	0.0231533	3.75689	8.71233e-07	up
Islr	-	chr8:62723486-62724773	2.2204	4.34452e-06	2.70521	1.43574	0.00035	—	—	2.21243	8.44268e-05	up
Tnfrsf1a	+	chr4:224881444-224894088	3.88757	4.94889e-10	5.35449	2.42075	5e-05	1.3558	0.0169567	2.7243	1.28231e-06	up
Vamp5	-	chr4:165002076-165013304	3.02801	1.08931e-08	3.94499	1.98002	0.0008	1.1235	0.0115198	2.17191	7.41594e-05	up
Fmo5	+	chr2:219274826-219301535	5.72444	2.3838e-07	2.82028	1.49584	0.00345	—	—	1.1807	0.00179658	up
Parvg	+	chr7:63279791-63298465	11.3134	1.89763e-08	2.54992	1.35045	0.00075	1.49964	0.0280922	1.75073	2.36553e-05	up
Psme1	+	chr15:38146265-38153351	2.0749	6.50865e-10	2.06534	1.04638	5e-05	—	—	1.94503	1.58859e-07	up
Kdelr3	+	chr7:120748514-120753159	3.20782	4.93007e-06	3.10331	1.63381	0.0002	—	—	1.78782	0.00033933	up
Cybb	+	chrX:15359335-15392482	8.55903	3.68577e-08	3.72836	1.89854	5e-05	1.20441	0.0155021	5.00156	1.62191e-06	up
B4galt1	-	chr5:61653277-61700179	7.31841	4.42155e-06	3.22847	1.69085	5e-05	—	—	2.16566	9.2085e-07	up
Anxa2	+	chr8:80014370-80050842	12.9897	2.46325e-08	13.2867	3.73191	5e-05	1.79315	0.0136312	3.54194	1.20295e-05	up
Ephb4	-	chr12:24408832-24432402	4.4059	7.27505e-08	2.07919	1.05602	0.00165	—	—	1.25639	0.00148411	up
Arl11	+	chr15:45448922-45451069	2.25365	3.95486e-07	2.49891	1.3213	0.01155	1.95139	0.0109657	4.75733	1.78249e-07	up
Srsf9	-	chr12:48833031-48839338	2.45932	4.95133e-07	2.65914	1.41096	5e-05	—	—	1.26394	1.55119e-05	up
Cd14	-	chr18:29265352-29266946	52.6219	5.36506e-07	80.5437	6.3317	0.0001	2.72708	0.0136659	4.08377	2.93549e-06	up
Lst1	-	chr20:7249281-7252477	13.495	1.86067e-08	inf	inf	0.00065	2.33123	0.0192877	2.68544	0.000130995	up
Parp9	-	chr11:70812298-70845022	3.02576	4.83947e-09	2.30763	1.20641	5e-05	—	—	1.94689	1.05036e-05	up
Trip6	+	chr12:24466256-24470664	3.39162	4.38082e-06	4.21961	2.07711	5e-05	—	—	1.25223	0.000173947	up
Cd9	-	chr4:224989641-225022649	3.02437	1.11545e-06	2.19582	1.13476	5e-05	—	—	1.16529	1.69616e-05	up
Lyve1	-	chr1:182650924-182664312	2.03138	1.25183e-06	2.74967	1.45926	5e-05	1.01165	0.0469123	1.67247	0.021725	up
Nabp1	+	chr9:54750052-54757517	2.21698	1.3782e-09	2.1319	1.09214	5e-05	—	—	1.15945	0.000432962	up
Prss23	-	chr1:160037253-160045625	3.77696	1.85353e-07	4.59537	2.20018	5e-05	—	—	1.28195	0.00147136	up
Mall	+	chr3:127027444-127060350	4.72902	1.51117e-08	3.12566	1.64416	0.002	—	—	1.35229	0.000283992	up
Ptbp1	-	chr7:12711158-12963915	4.48384	1.34716e-07	3.06511	1.61594	0.04095	—	—	1.68749	3.27948e-05	up
Nrros	+	chr11:74956755-74973813	4.92069	2.97124e-06	2.28954	1.19506	0.0013	—	—	2.27186	8.71233e-07	up
Slfn13	-	chr10:69956874-69973195	4.63389	4.0022e-07	3.32257	1.7323	0.00055	—	—	2.40869	6.67037e-07	up
Cmtm6	+	chr8:122101556-122119645	3.33795	4.59818e-08	2.21895	1.14988	5e-05	—	—	2.2972	3.47991e-07	up
Plscr2	+	chr8:99199388-99210702	5.35862	4.12416e-08	2.26578	1.18001	0.01045	—	—	2.04669	0.000312172	up
Cebpd	+	chr11:92069788-92070898	15.3243	6.5601e-09	12.2768	3.61786	5e-05	1.44127	0.021632	1.72882	8.62437e-05	up
Mmrn2	+	chr16:9055401-9075350	2.3927	6.72448e-07	2.65652	1.40954	5e-05	—	—	1.20977	0.000343623	up
Bcl3	-	chr1:81996115-82010351	16.4638	1.17663e-07	28.3118	4.82333	0.0013	2.46083	0.0134413	1.68199	0.000158738	up
Hic1	-	chr10:61721539-61723972	3.08765	4.36854e-06	2.11897	1.08336	0.0069	—	—	1.29565	3.23325e-05	up
Fbln1	+	chr7:125810695-125890371	3.63346	5.43348e-12	2.20038	1.13775	5e-05	—	—	2.27865	2.10814e-05	up
Enpep	-	chr2:252991592-253065721	5.79963	7.45161e-08	2.54992	1.35045	0.00055	—	—	—	—	up
Cdkn3	+	chr15:27496740-27508022	5.43008	1.07357e-07	5.38979	2.43023	0.0027	—	—	3.07472	2.15537e-06	up
Casp1	+	chr8:2627972-2636854	2.82151	3.61667e-07	2.5134	1.32964	0.00275	1.14941	0.0115062	3.13338	3.2661e-07	up
C1qc	-	chr5:159017514-159021135	4.20244	3.59246e-06	4.35197	2.12167	5e-05	2.01595	0.0123161	3.96436	6.7397e-08	up
Npl	-	chr13:75903277-75946056	3.65655	2.30221e-06	2.11547	1.08098	5e-05	—	—	2.72033	1.85345e-06	up
Nfkbiz	+	chr11:50420562-50447282	4.12329	7.15502e-06	6.14388	2.61915	5e-05	—	—	1.04309	0.00158022	up
Folr2	-	chr1:173104847-173110514	8.02408	3.96434e-13	4.49924	2.16968	0.01765	2.73406	0.0157604	4.44862	4.55006e-06	up
Cdk1	+	chr20:22694919-22709859	6.20812	3.72277e-06	3.27297	1.7106	0.0248	3.25724	0.0108658	3.85167	1.07838e-07	up
Ifitm2	-	chr1:220671381-220672562	4.84076	4.30046e-07	3.51209	1.81233	5e-05	1.30854	0.0185628	3.30005	1.63232e-05	up
Upk1b	-	chr11:67555642-67586433	7.62883	3.10778e-08	4.12822	2.04552	0.00485	—	—	1.0469	0.0269663	up
PCOLCE2	+	chr8:102910333-102934915	2.55874	4.84554e-07	2.44105	1.2875	0.00715	—	—	1.0266	0.00591374	up
Gpr84	-	chr7:142714631-142716825	3.28838	2.29705e-08	2.46164	1.29962	0.00095	1.6356	0.010185	3.70524	1.29392e-07	up
Adamts7	+	chr8:97035310-97074365	5.41067	6.1955e-09	9.27187	3.21286	5e-05	1.17563	0.017945	—	—	up
Itga5	-	chr7:142750120-142773323	8.7907	1.94547e-08	33.8952	5.08301	5e-05	1.13454	0.0190077	—	—	up
Spi1	+	chr3:86627763-86646458	2.58396	6.24554e-07	3.96368	1.98684	5e-05	1.24142	0.0155634	—	—	up
Calca	-	chr1:191158062-191162954	5.05436	1.7146e-08	14.4109	3.84909	0.00175	3.08742	0.010185	—	—	up
Ifi47	+	chr10:34059638-34072272	2.87612	1.32598e-08	2.8564	1.5142	0.0004	1.35177	0.027724	—	—	up
Gpd1	+	chrX:115875187-115882576	15.6483	1.04854e-07	10.1562	3.34429	5e-05	1.1234	0.0122166	—	—	up
Hmgb2	-	chr16:35886763-35889338	2.10936	4.95163e-07	2.39144	1.25788	5e-05	1.45321	0.0134413	—	—	up
Tgfb1	+	chr1:83742150-83758471	4.46501	4.65944e-08	5.00722	2.32401	5e-05	1.20107	0.0134413	—	—	up
Trim47	+	chr10:103626182-103647394	4.00862	1.66014e-08	9.18131	3.1987	5e-05	1.18868	0.0235963	—	—	up
Glipr2	+	chr5:63950140-63968973	20.1324	1.4502e-08	12.7664	3.67428	0.0028	1.39883	0.0132874	—	—	up
Eif4ebp1	-	chr16:68580279-68593651	3.62001	6.04742e-07	3.72151	1.89589	5e-05	1.00882	0.0212108	—	—	up
Aspg	+	chr6:145692074-145711786	28.9613	6.47221e-10	24.2415	4.59941	0.00015	2.27956	0.0305665	—	—	up
Ssc5d	+	chr1:76074529-76092319	4.45606	4.72545e-08	2.78568	1.47803	5e-05	1.4996	0.0213555	—	—	up
Nes	+	chr2:206747072-206755585	95.8	6.21092e-08	20.9355	4.38788	5e-05	1.99079	0.0147756	—	—	up
Clec4a2	-	chr4:222810975-222885995	55.1429	6.68822e-09	inf	inf	5e-05	1.29008	0.0269851	—	—	up
Sbno2	+	chr7:12641926-12685802	8.05792	2.35467e-09	5.62023	2.49063	5e-05	1.00693	0.0318969	—	—	up
Adamts1	-	chr11:28965541-28974878	28.4854	2.09338e-08	20.0664	4.32671	5e-05	1.44706	0.0167502	—	—	up
Ecm1	-	chr2:217345268-217350435	29.6829	1.88914e-08	4.90336	2.29377	5e-05	1.07806	0.0217511	—	—	up
Msr1	-	chr16:56517028-56597077	134.1	3.15921e-09	63.2845	5.98378	5e-05	1.74083	0.037468	—	—	up
Plp2	+	chrX:16470479-16473878	10.4894	1.62837e-07	16.1725	4.01547	5e-05	2.33982	0.0148589	—	—	up
A3galt2	+	chr5:150671101-150683390	10.6602	1.09588e-08	14.4134	3.84934	5e-05	1.3502	0.0407653	—	—	up
Pmp2	+	chr2:113582540-113586204	6.27349	7.51662e-08	7.56264	2.91889	0.00855	1.27369	0.0154706	—	—	up
Rrm2	+	chr6:60756210-60761048	4.40777	1.3289e-09	4.77741	2.25623	0.0241	3.19736	0.010805	—	—	up
RT1-A2	+	chr20:7433432-7436985	3.03191	5.48302e-06	4.23015	2.08071	5e-05	1.18875	0.0115965	—	—	up
C2	-	chr20:6616010-6641139	2.55154	2.38383e-06	4.05612	2.0201	5e-05	1.32779	0.010185	—	—	up
Pde10a	-	chr1:53617429-53846125	-4.6703	4.35397e-09	-4.00505	-2.00182	5e-05	-1.16648	0.0123912	-1.48684	0.000464426	down
Myo5b	+	chr18:69568404-69866976	-2.74008	1.2133e-07	-2.10618	-1.07463	5e-05	—	—	-1.00878	0.00599139	down
Cpne4	+	chr8:112491425-112972591	-2.7667	2.61213e-06	-2.5907	-1.37334	5e-05	—	—	-1.11528	0.0305653	down
Mpped1	+	chr7:124671297-124740991	-2.42719	7.02382e-11	-2.13801	-1.09627	5e-05	—	—	-1.01892	0.000355064	down
Camkk2	+	chr12:41155842-41191356	-2.06625	6.44628e-07	-3.14204	-1.6517	5e-05	-1.02387	0.0444992	-1.71727	0.00705439	down
Dmtn	-	chr15:56016281-56043902	-2.08933	6.96395e-10	-2.16559	-1.11476	5e-05	—	—	-1.12446	0.00110427	down
Cdh10	+	chr2:89140757-89451908	-2.02689	2.05375e-08	-2.10738	-1.07545	5e-05	—	—	-1.03445	0.00051679	down
Nefm	+	chr15:46736821-46741141	-2.78883	2.23151e-07	-2.27099	-1.18332	5e-05	—	—	-1.36484	3.08396e-05	down
Trim54	-	chr6:36419743-36439076	-4.60217	4.18258e-09	-2.62306	-1.39125	0.00015	—	—	-1.80752	0.00117832	down
Camk4	+	chr18:25464154-25680622	-3.86293	1.02393e-11	-3.22306	-1.68843	5e-05	—	—	-1.78663	6.57026e-05	down
Dclk3	+	chr8:119040829-119093605	-3.767	3.34098e-08	-2.64407	-1.40276	5e-05	—	—	-1.41907	0.00334367	down
Erich3	+	chr2:279661643-279694441	-2.26191	1.13143e-07	-2.02542	-1.01822	5e-05	—	—	-1.00525	0.0062795	down
Fam81a	+	chr8:76497581-76554483	-2.92847	4.7084e-09	-2.18297	-1.12629	5e-05	—	—	-1.25773	0.00215726	down
Plch2	-	chr5:175842862-175872351	-6.32121	8.18534e-11	-2.49832	-1.32096	5e-05	—	—	-1.05753	5.5267e-05	down
Vstm5	+	chr8:13731413-13755647	-2.93141	9.35585e-11	-2.10439	-1.0734	0.00185	—	—	-1.03454	9.51156e-05	down
Cdh12	+	chr2:91863899-92268636	-3.19574	6.33764e-08	-2.45105	-1.2934	5e-05	—	—	-1.4677	0.00270575	down
RGD1310819	-	chr9:43896223-43935094	-2.25786	5.19109e-10	-2.22576	-1.1543	5e-05	—	—	-1.02653	3.73323e-05	down
Grin2a	+	chr10:4527219-4936773	-2.65858	5.81734e-12	-2.17217	-1.11914	5e-05	—	—	-1.54361	0.000184692	down
Olr59	-	chr1:174082185-174088103	-3.17045	2.95367e-07	-2.57644	-1.36538	5e-05	—	—	-1.25788	0.042898	down
Gria3	+	chrX:127656583-127922234	-2.36766	1.65324e-09	-2.17452	-1.1207	5e-05	—	—	-1.21394	0.000847111	down
Tuba4a	-	chr9:82184865-82188549	-2.61196	4.47412e-10	-2.08443	-1.05965	5e-05	—	—	-1.08452	0.000167891	down
Shank2	+	chr1:224028790-224445824	-2.06083	3.3617e-07	-2.00541	-1.0039	5e-05	—	—	-1.1219	0.000202622	down
Gria4	-	chr8:1542036-2069626	-2.10297	2.3867e-07	-2.02813	-1.02015	5e-05	—	—	-1.1612	0.00473962	down
Dlgap3	+	chr5:149027226-149073369	-2.2535	4.21051e-07	-2.53129	-1.33987	5e-05	—	—	-1.17386	3.30498e-06	down
Kcnd2	+	chr4:48100007-48607643	-2.14857	1.22162e-07	-2.19167	-1.13203	5e-05	—	—	-1.11557	2.18172e-05	down
Syne1	-	chr1:42947844-43100865	-2.47698	1.98749e-09	-2.00301	-1.00217	5e-05	—	—	-1.11553	0.000267034	down
Fxyd7	-	chr1:90630082-90639081	-2.72858	5.1281e-11	-2.37282	-1.2466	5e-05	—	—	-1.38912	0.00236288	down
LOC100125362	-	chr8:55822040-55828684	-2.51453	3.96189e-08	-2.28602	-1.19284	5e-05	—	—	-1.19982	0.00449974	down
Syndig1	+	chr3:151405854-151571800	-3.36391	9.98632e-10	-2.12066	-1.08451	5e-05	—	—	-1.24791	2.76553e-05	down
Bhlhe22	+	chr2:122425611-122428723	-3.3158	3.01576e-08	-2.70508	-1.43567	5e-05	—	—	-1.05573	0.000991726	down
Drd1	+	chr17:13212534-13214770	-3.56029	3.79926e-10	-2.77349	-1.4717	5e-05	—	—	-1.42285	0.0465595	down
Dgkb	+	chr6:67113445-67868708	-4.61824	2.05446e-12	-3.111	-1.63738	5e-05	—	—	-1.29762	0.000364148	down
Gpr88	-	chr2:237334864-237339419	-3.36488	5.38294e-10	-2.39933	-1.26263	5e-05	-1.11556	0.010805	-1.60301	0.0124304	down
Rnf112	-	chr10:47491744-47497296	-2.32822	4.1317e-07	-2.24148	-1.16445	5e-05	—	—	-1.12326	5.13408e-06	down
Scn1a	-	chr3:59009806-59095363	-2.41297	2.0061e-10	-2.14755	-1.10269	0.01065	—	—	-1.13775	0.00904257	down
Trhde	-	chr7:57265683-57693174	-2.34823	7.22616e-06	-2.1846	-1.12737	5e-05	—	—	-1.26009	0.000184282	down
Atp2b2	-	chr4:209001177-209104640	-2.75853	4.78088e-10	-2.16108	-1.11175	5e-05	—	—	-1.43435	0.00536085	down
Neurod1	-	chr3:72963672-72997517	-3.4585	1.03015e-07	-4.17967	-2.06339	5e-05	—	—	-1.01139	0.000292664	down
Nr4a2	-	chr3:48183105-48191132	-2.86668	1.47643e-09	-2.03345	-1.02393	0.0035	—	—	-1.46034	0.00328763	down
Syt17	-	chr1:194982173-195048211	-3.0638	1.56713e-06	-2.40998	-1.26902	5e-05	—	—	-1.0452	6.43769e-05	down
Adra1d	-	chr3:130621198-130637207	-2.13423	1.34281e-07	-2.02365	-1.01696	5e-05	—	—	-1.06362	0.00107762	down
Gabrd	-	chr5:176255723-176267624	-4.05008	1.05854e-11	-3.4843	-1.80087	5e-05	—	—	-1.88338	0.00455339	down
Scn4b	+	chr8:48067554-48082728	-7.56148	3.93408e-12	-2.38441	-1.25363	5e-05	—	—	-1.87724	2.65895e-05	down
Fndc5	+	chr5:151057692-151062818	-2.18963	5.46063e-11	-2.51129	-1.32843	5e-05	—	—	-1.04342	0.000188503	down
Mycn	-	chr6:51348169-51353994	-2.78512	2.06571e-09	-2.75505	-1.46208	5e-05	—	—	-1.12012	0.00309827	down
Mgat5b	+	chr10:105520094-105589480	-2.35373	3.12464e-11	-2.09657	-1.06803	5e-05	—	—	-1.03956	0.00166437	down
Lrrc4	-	chr4:55519817-55919017	-2.2516	1.90096e-07	-2.23996	-1.16347	0.01235	—	—	-1.01754	0.0011507	down
Penk	-	chr5:21834413-21839739	-2.65499	1.95076e-08	-2.56069	-1.35653	5e-05	—	—	-1.55961	0.0158216	down
Sertm1	-	chr2:163721931-163741483	-2.65649	8.70498e-11	-2.17587	-1.12159	5e-05	—	—	-1.02224	0.000198209	down
Kcnk1	+	chr19:69519244-69555914	-2.76718	7.73835e-10	-2.01915	-1.01375	5e-05	—	—	-1.22474	0.0039735	down
Prkg2	+	chr14:12160806-12255994	-2.72279	4.7744e-11	-2.84443	-1.50814	5e-05	—	—	-1.36852	0.00228375	down
Neu2	+	chr9:94440841-94444057	-23.6667	1.19273e-11	-2.92639	-1.54912	0.00015	-1.04178	0.0135366	-1.561	0.000130552	down
Kctd1	-	chr18:6337409-6378501	-2.85251	2.74907e-10	-2.5994	-1.37818	5e-05	—	—	-1.21915	0.000453528	down
Rtn4r	-	chr11:90085448-90086849	-2.43914	1.63989e-11	-2.53162	-1.34006	5e-05	—	—	-1.186	0.000503076	down
Pdyn	+	chr3:127809951-127822294	-2.44944	1.53431e-10	-2.68349	-1.42411	5e-05	—	—	-1.40715	0.000405056	down
Drd2	+	chr8:52298096-52363812	-6.234	6.76307e-12	-4.90734	-2.29494	5e-05	-1.17574	0.010805	-1.46725	0.0308286	down
Hnmt	-	chr3:896389-958192	-2.46796	2.11603e-11	-3.44982	-1.78652	5e-05	—	—	-1.03815	0.000917486	down
Olfm3	+	chr2:236054945-236097056	-3.49747	4.14036e-08	-2.19212	-1.13233	5e-05	—	—	-1.10487	0.0290419	down
Tacr3	+	chr2:258547660-258644112	-4.33312	1.49014e-08	-5.28283	-2.40131	5e-05	—	—	-1.08087	0.00564553	down
Pcdh20	-	chr15:75353078-75359335	-4.12844	1.58072e-08	-3.04573	-1.60679	5e-05	—	—	-1.42017	0.000183045	down
Aldh1a1	+	chr1:245521321-245562969	-63.3	8.08564e-06	-2.37333	-1.24691	5e-05	—	—	-1.45831	0.000212878	down
Abcd2	-	chr7:131968472-132017044	-3.63301	1.03625e-12	-3.72701	-1.89802	5e-05	—	—	-1.29631	0.000154089	down
Mast3	+	chr16:20257644-20271835	-3.05469	1.32772e-11	-2.47808	-1.30922	5e-05	—	—	-1.09876	9.27122e-06	down
Ephx4	-	chr14:3364192-3393612	-2.75839	2.30779e-11	-2.20604	-1.14146	5e-05	—	—	-1.43723	0.0112962	down
Lix1	+	chr1:60083351-60139891	-3.20814	8.09798e-11	-3.54091	-1.82412	5e-05	—	—	-1.03899	8.16134e-05	down
Cacng3	+	chr1:199676987-199771889	-2.50558	8.03398e-07	-2.94007	-1.55585	5e-05	—	—	-1.51176	0.000610548	down
Kcnv1	-	chr7:84030572-84037747	-3.48662	4.04902e-10	-2.49772	-1.32061	5e-05	—	—	-1.91657	1.87695e-05	down
Kcnj4	-	chr7:120710787-120738030	-2.7342	4.59276e-09	-2.70189	-1.43397	5e-05	—	—	-1.04178	0.000256663	down
Ephb3	-	chr11:86602389-86621102	-2.10362	7.94339e-11	-2.3056	-1.20514	5e-05	—	—	-1.17298	0.000580473	down
Rbfox1	-	chr10:7109395-7450683	-2.27536	9.14872e-11	-2.13785	-1.09616	5e-05	—	—	-1.20171	4.71212e-06	down
Ankrd34a	+	chr2:218208657-218212088	-5.17179	5.78994e-10	-2.40202	-1.26425	5e-05	—	—	-1.10426	0.000159157	down
Lrtm2	-	chr4:217213922-217324172	-2.45457	1.90596e-07	-3.0092	-1.58938	5e-05	—	—	-1.10381	0.00289566	down
Slc13a5	-	chr10:58550464-58574301	-5.54651	4.91253e-06	-2.4931	-1.31794	5e-05	—	—	-1.02963	3.28124e-05	down
Sptssb	-	chr2:186020423-186049284	-8.76248	1.00823e-09	-3.56398	-1.83349	5e-05	—	—	-1.91416	0.00290198	down
Dact2	-	chr1:57354080-57362996	-2.12014	9.36367e-08	-2.33721	-1.22479	5e-05	—	—	-1.15597	0.0408645	down
Itpka	+	chr3:118019054-118135613	-2.63579	3.67196e-09	-2.4593	-1.29825	0.00015	—	—	-1.32424	8.07054e-07	down
Ppp1r1b	+	chr10:86100810-86109846	-2.37812	1.12107e-09	-2.43203	-1.28216	5e-05	-1.16068	0.0108658	-1.04824	0.00866022	down
Kcns1	-	chr3:166739098-166746415	-2.76882	8.44729e-11	-2.69533	-1.43046	5e-05	—	—	-1.31684	0.00181889	down
C1qtnf4	+	chr3:86422686-86427145	-2.1918	2.03582e-08	-2.14285	-1.09953	5e-05	—	—	-1.24565	0.000421165	down
Adra2c	-	chr14:81422366-81423743	-3.19068	3.92937e-10	-2.9996	-1.58477	5e-05	—	—	-1.04019	9.78238e-05	down
Rgs9	-	chr10:97225540-97298645	-3.05575	1.91877e-07	-5.03241	-2.33125	5e-05	-1.33696	0.010185	—	—	down
Adora2a	-	chr20:16449384-16466147	-4.4312	1.0647e-09	-5.28953	-2.40314	5e-05	-1.33242	0.010185	—	—	down
Syndig1l	+	chr6:117134069-117155831	-2.3303	6.79039e-08	-4.44434	-2.15197	5e-05	-1.21753	0.010185	—	—	down
Rasgrp2	+	chr1:228761042-228776703	-3.31644	3.24619e-10	-3.93393	-1.97597	5e-05	-1.0634	0.0148666	—	—	down
Kcnh4	-	chr10:88441733-88461552	-3.8627	7.61524e-12	-3.78748	-1.92124	5e-05	-1.15698	0.0253273	—	—	down

## Sheet: Sheet2
Gene	Differentially methylated RNA sites				Differentially expressed genes			GSE78731		GSE61616		Regulation
	strand	locus	Fold change	P_value	Fold change	logFC	P_value	logFC	P_value	logFC	P_value
Pde10a	-	chr1:53617429-53846125	-4.6703	4.35397e-09	-4.00505	-2.00182	5e-05	-1.16648	0.0123912	-1.48684	0.000464426	down
Myo5b	+	chr18:69568404-69866976	-2.74008	1.2133e-07	-2.10618	-1.07463	5e-05	—	—	-1.00878	0.00599139	down
Cpne4	+	chr8:112491425-112972591	-2.7667	2.61213e-06	-2.5907	-1.37334	5e-05	—	—	-1.11528	0.0305653	down
Mpped1	+	chr7:124671297-124740991	-2.42719	7.02382e-11	-2.13801	-1.09627	5e-05	—	—	-1.01892	0.000355064	down
Camkk2	+	chr12:41155842-41191356	-2.06625	6.44628e-07	-3.14204	-1.6517	5e-05	-1.02387	0.0444992	-1.71727	0.00705439	down
Dmtn	-	chr15:56016281-56043902	-2.08933	6.96395e-10	-2.16559	-1.11476	5e-05	—	—	-1.12446	0.00110427	down
Cdh10	+	chr2:89140757-89451908	-2.02689	2.05375e-08	-2.10738	-1.07545	5e-05	—	—	-1.03445	0.00051679	down
Nefm	+	chr15:46736821-46741141	-2.78883	2.23151e-07	-2.27099	-1.18332	5e-05	—	—	-1.36484	3.08396e-05	down
Trim54	-	chr6:36419743-36439076	-4.60217	4.18258e-09	-2.62306	-1.39125	0.00015	—	—	-1.80752	0.00117832	down
Camk4	+	chr18:25464154-25680622	-3.86293	1.02393e-11	-3.22306	-1.68843	5e-05	—	—	-1.78663	6.57026e-05	down
Dclk3	+	chr8:119040829-119093605	-3.767	3.34098e-08	-2.64407	-1.40276	5e-05	—	—	-1.41907	0.00334367	down
Erich3	+	chr2:279661643-279694441	-2.26191	1.13143e-07	-2.02542	-1.01822	5e-05	—	—	-1.00525	0.0062795	down
Fam81a	+	chr8:76497581-76554483	-2.92847	4.7084e-09	-2.18297	-1.12629	5e-05	—	—	-1.25773	0.00215726	down
Plch2	-	chr5:175842862-175872351	-6.32121	8.18534e-11	-2.49832	-1.32096	5e-05	—	—	-1.05753	5.5267e-05	down
Vstm5	+	chr8:13731413-13755647	-2.93141	9.35585e-11	-2.10439	-1.0734	0.00185	—	—	-1.03454	9.51156e-05	down
Cdh12	+	chr2:91863899-92268636	-3.19574	6.33764e-08	-2.45105	-1.2934	5e-05	—	—	-1.4677	0.00270575	down
RGD1310819	-	chr9:43896223-43935094	-2.25786	5.19109e-10	-2.22576	-1.1543	5e-05	—	—	-1.02653	3.73323e-05	down
Grin2a	+	chr10:4527219-4936773	-2.65858	5.81734e-12	-2.17217	-1.11914	5e-05	—	—	-1.54361	0.000184692	down
Olr59	-	chr1:174082185-174088103	-3.17045	2.95367e-07	-2.57644	-1.36538	5e-05	—	—	-1.25788	0.042898	down
Gria3	+	chrX:127656583-127922234	-2.36766	1.65324e-09	-2.17452	-1.1207	5e-05	—	—	-1.21394	0.000847111	down
Tuba4a	-	chr9:82184865-82188549	-2.61196	4.47412e-10	-2.08443	-1.05965	5e-05	—	—	-1.08452	0.000167891	down
Shank2	+	chr1:224028790-224445824	-2.06083	3.3617e-07	-2.00541	-1.0039	5e-05	—	—	-1.1219	0.000202622	down
Gria4	-	chr8:1542036-2069626	-2.10297	2.3867e-07	-2.02813	-1.02015	5e-05	—	—	-1.1612	0.00473962	down
Dlgap3	+	chr5:149027226-149073369	-2.2535	4.21051e-07	-2.53129	-1.33987	5e-05	—	—	-1.17386	3.30498e-06	down
Kcnd2	+	chr4:48100007-48607643	-2.14857	1.22162e-07	-2.19167	-1.13203	5e-05	—	—	-1.11557	2.18172e-05	down
Syne1	-	chr1:42947844-43100865	-2.47698	1.98749e-09	-2.00301	-1.00217	5e-05	—	—	-1.11553	0.000267034	down
Fxyd7	-	chr1:90630082-90639081	-2.72858	5.1281e-11	-2.37282	-1.2466	5e-05	—	—	-1.38912	0.00236288	down
LOC100125362	-	chr8:55822040-55828684	-2.51453	3.96189e-08	-2.28602	-1.19284	5e-05	—	—	-1.19982	0.00449974	down
Syndig1	+	chr3:151405854-151571800	-3.36391	9.98632e-10	-2.12066	-1.08451	5e-05	—	—	-1.24791	2.76553e-05	down
Bhlhe22	+	chr2:122425611-122428723	-3.3158	3.01576e-08	-2.70508	-1.43567	5e-05	—	—	-1.05573	0.000991726	down
Drd1	+	chr17:13212534-13214770	-3.56029	3.79926e-10	-2.77349	-1.4717	5e-05	—	—	-1.42285	0.0465595	down
Dgkb	+	chr6:67113445-67868708	-4.61824	2.05446e-12	-3.111	-1.63738	5e-05	—	—	-1.29762	0.000364148	down
Gpr88	-	chr2:237334864-237339419	-3.36488	5.38294e-10	-2.39933	-1.26263	5e-05	-1.11556	0.010805	-1.60301	0.0124304	down
Rnf112	-	chr10:47491744-47497296	-2.32822	4.1317e-07	-2.24148	-1.16445	5e-05	—	—	-1.12326	5.13408e-06	down
Scn1a	-	chr3:59009806-59095363	-2.41297	2.0061e-10	-2.14755	-1.10269	0.01065	—	—	-1.13775	0.00904257	down
Trhde	-	chr7:57265683-57693174	-2.34823	7.22616e-06	-2.1846	-1.12737	5e-05	—	—	-1.26009	0.000184282	down
Atp2b2	-	chr4:209001177-209104640	-2.75853	4.78088e-10	-2.16108	-1.11175	5e-05	—	—	-1.43435	0.00536085	down
Neurod1	-	chr3:72963672-72997517	-3.4585	1.03015e-07	-4.17967	-2.06339	5e-05	—	—	-1.01139	0.000292664	down
Nr4a2	-	chr3:48183105-48191132	-2.86668	1.47643e-09	-2.03345	-1.02393	0.0035	—	—	-1.46034	0.00328763	down
Syt17	-	chr1:194982173-195048211	-3.0638	1.56713e-06	-2.40998	-1.26902	5e-05	—	—	-1.0452	6.43769e-05	down
Adra1d	-	chr3:130621198-130637207	-2.13423	1.34281e-07	-2.02365	-1.01696	5e-05	—	—	-1.06362	0.00107762	down
Gabrd	-	chr5:176255723-176267624	-4.05008	1.05854e-11	-3.4843	-1.80087	5e-05	—	—	-1.88338	0.00455339	down
Scn4b	+	chr8:48067554-48082728	-7.56148	3.93408e-12	-2.38441	-1.25363	5e-05	—	—	-1.87724	2.65895e-05	down
Fndc5	+	chr5:151057692-151062818	-2.18963	5.46063e-11	-2.51129	-1.32843	5e-05	—	—	-1.04342	0.000188503	down
Mycn	-	chr6:51348169-51353994	-2.78512	2.06571e-09	-2.75505	-1.46208	5e-05	—	—	-1.12012	0.00309827	down
Mgat5b	+	chr10:105520094-105589480	-2.35373	3.12464e-11	-2.09657	-1.06803	5e-05	—	—	-1.03956	0.00166437	down
Lrrc4	-	chr4:55519817-55919017	-2.2516	1.90096e-07	-2.23996	-1.16347	0.01235	—	—	-1.01754	0.0011507	down
Penk	-	chr5:21834413-21839739	-2.65499	1.95076e-08	-2.56069	-1.35653	5e-05	—	—	-1.55961	0.0158216	down
Sertm1	-	chr2:163721931-163741483	-2.65649	8.70498e-11	-2.17587	-1.12159	5e-05	—	—	-1.02224	0.000198209	down
Kcnk1	+	chr19:69519244-69555914	-2.76718	7.73835e-10	-2.01915	-1.01375	5e-05	—	—	-1.22474	0.0039735	down
Prkg2	+	chr14:12160806-12255994	-2.72279	4.7744e-11	-2.84443	-1.50814	5e-05	—	—	-1.36852	0.00228375	down
Neu2	+	chr9:94440841-94444057	-23.6667	1.19273e-11	-2.92639	-1.54912	0.00015	-1.04178	0.0135366	-1.561	0.000130552	down
Kctd1	-	chr18:6337409-6378501	-2.85251	2.74907e-10	-2.5994	-1.37818	5e-05	—	—	-1.21915	0.000453528	down
Rtn4r	-	chr11:90085448-90086849	-2.43914	1.63989e-11	-2.53162	-1.34006	5e-05	—	—	-1.186	0.000503076	down
Pdyn	+	chr3:127809951-127822294	-2.44944	1.53431e-10	-2.68349	-1.42411	5e-05	—	—	-1.40715	0.000405056	down
Drd2	+	chr8:52298096-52363812	-6.234	6.76307e-12	-4.90734	-2.29494	5e-05	-1.17574	0.010805	-1.46725	0.0308286	down
Hnmt	-	chr3:896389-958192	-2.46796	2.11603e-11	-3.44982	-1.78652	5e-05	—	—	-1.03815	0.000917486	down
Olfm3	+	chr2:236054945-236097056	-3.49747	4.14036e-08	-2.19212	-1.13233	5e-05	—	—	-1.10487	0.0290419	down
Tacr3	+	chr2:258547660-258644112	-4.33312	1.49014e-08	-5.28283	-2.40131	5e-05	—	—	-1.08087	0.00564553	down
Pcdh20	-	chr15:75353078-75359335	-4.12844	1.58072e-08	-3.04573	-1.60679	5e-05	—	—	-1.42017	0.000183045	down
Aldh1a1	+	chr1:245521321-245562969	-63.3	8.08564e-06	-2.37333	-1.24691	5e-05	—	—	-1.45831	0.000212878	down
Abcd2	-	chr7:131968472-132017044	-3.63301	1.03625e-12	-3.72701	-1.89802	5e-05	—	—	-1.29631	0.000154089	down
Mast3	+	chr16:20257644-20271835	-3.05469	1.32772e-11	-2.47808	-1.30922	5e-05	—	—	-1.09876	9.27122e-06	down
Ephx4	-	chr14:3364192-3393612	-2.75839	2.30779e-11	-2.20604	-1.14146	5e-05	—	—	-1.43723	0.0112962	down
Lix1	+	chr1:60083351-60139891	-3.20814	8.09798e-11	-3.54091	-1.82412	5e-05	—	—	-1.03899	8.16134e-05	down
Cacng3	+	chr1:199676987-199771889	-2.50558	8.03398e-07	-2.94007	-1.55585	5e-05	—	—	-1.51176	0.000610548	down
Kcnv1	-	chr7:84030572-84037747	-3.48662	4.04902e-10	-2.49772	-1.32061	5e-05	—	—	-1.91657	1.87695e-05	down
Kcnj4	-	chr7:120710787-120738030	-2.7342	4.59276e-09	-2.70189	-1.43397	5e-05	—	—	-1.04178	0.000256663	down
Ephb3	-	chr11:86602389-86621102	-2.10362	7.94339e-11	-2.3056	-1.20514	5e-05	—	—	-1.17298	0.000580473	down
Rbfox1	-	chr10:7109395-7450683	-2.27536	9.14872e-11	-2.13785	-1.09616	5e-05	—	—	-1.20171	4.71212e-06	down
Ankrd34a	+	chr2:218208657-218212088	-5.17179	5.78994e-10	-2.40202	-1.26425	5e-05	—	—	-1.10426	0.000159157	down
Lrtm2	-	chr4:217213922-217324172	-2.45457	1.90596e-07	-3.0092	-1.58938	5e-05	—	—	-1.10381	0.00289566	down
Slc13a5	-	chr10:58550464-58574301	-5.54651	4.91253e-06	-2.4931	-1.31794	5e-05	—	—	-1.02963	3.28124e-05	down
Sptssb	-	chr2:186020423-186049284	-8.76248	1.00823e-09	-3.56398	-1.83349	5e-05	—	—	-1.91416	0.00290198	down
Dact2	-	chr1:57354080-57362996	-2.12014	9.36367e-08	-2.33721	-1.22479	5e-05	—	—	-1.15597	0.0408645	down
Itpka	+	chr3:118019054-118135613	-2.63579	3.67196e-09	-2.4593	-1.29825	0.00015	—	—	-1.32424	8.07054e-07	down
Ppp1r1b	+	chr10:86100810-86109846	-2.37812	1.12107e-09	-2.43203	-1.28216	5e-05	-1.16068	0.0108658	-1.04824	0.00866022	down
Kcns1	-	chr3:166739098-166746415	-2.76882	8.44729e-11	-2.69533	-1.43046	5e-05	—	—	-1.31684	0.00181889	down
C1qtnf4	+	chr3:86422686-86427145	-2.1918	2.03582e-08	-2.14285	-1.09953	5e-05	—	—	-1.24565	0.000421165	down
Adra2c	-	chr14:81422366-81423743	-3.19068	3.92937e-10	-2.9996	-1.58477	5e-05	—	—	-1.04019	9.78238e-05	down
Rgs9	-	chr10:97225540-97298645	-3.05575	1.91877e-07	-5.03241	-2.33125	5e-05	-1.33696	0.010185	—	—	down
Adora2a	-	chr20:16449384-16466147	-4.4312	1.0647e-09	-5.28953	-2.40314	5e-05	-1.33242	0.010185	—	—	down
Syndig1l	+	chr6:117134069-117155831	-2.3303	6.79039e-08	-4.44434	-2.15197	5e-05	-1.21753	0.010185	—	—	down
Rasgrp2	+	chr1:228761042-228776703	-3.31644	3.24619e-10	-3.93393	-1.97597	5e-05	-1.0634	0.0148666	—	—	down
Kcnh4	-	chr10:88441733-88461552	-3.8627	7.61524e-12	-3.78748	-1.92124	5e-05	-1.15698	0.0253273	—	—	down
